# Supplementary material
Source: PubMed Central journal article supplement (PMC3780887)
Supplement: 1221166110_pnas.201221166SI.pdf [file 1221166110_pnas.201221166SI.pdf]

# Supporting Information

Ferry et al. 10.1073/pnas.1221166110

**Audio File S1.** This audio file contains the call from a blue-eyed Madagascar lemur (*Eulemur macaco flavifrons*) that accompanied the visual stimuli for experiment 1.

[Audio File S1](#)

**Audio File S2.** This audio file contains the segment of backward speech that accompanied the visual stimuli for experiment 2. This was created by reversing the recording of a nonce-word labeling phrase ("Look at the modi! Do you see the modi?") (17, 23).

[Audio File S2](#)
